# Supplementary material for: Reliable B Cell Epitope Predictions: Impacts of Method Development and Improved Benchmarking
Source: PLoS Comput Biol. 2012 Dec 27;8(12):e1002829. doi: 10.1371/journal.pcbi.1002829 (PMC3531324; doi:10.1371/journal.pcbi.1002829)
Supplement: Table S2 — Overview of surface exposure measures. Different surface measures were tested and trained for their ability to discriminate epitope from non-epitope residues (for details see text). (PDF) [file pcbi.1002829.s004.pdf]

| Method acronym | Description                                                                                                            | Scoring function                                         | Parameter |
|----------------|------------------------------------------------------------------------------------------------------------------------|----------------------------------------------------------|-----------|
| <b>FS</b>      | Full sphere neighbor count.                                                                                            | $FS(r, k)$                                               | $k$       |
| <b>UHS</b>     | Upper half-sphere neighbor count defined as the half-sphere around the residues C-alpha atom containing the side-chain | $UHS(r, k)$                                              | $k$       |
| <b>Ta</b>      | Count of neighbors with any atom within $T$ distance from any atom of the query residue                                | $Ta(r, T)$                                               | $T$       |
| <b>RSA</b>     | Relative surface accessibility                                                                                         | $RSA(r) = \frac{SA}{Max(SA)}$ SA = surface accessibility | None      |
| <b>HSE</b>     | Weighted upper and lower half-sphere as described in [22].                                                             | $HSE(r, k) = -0.5 * UHS(r, k) - 0.25 * DHS(r, k)$        | $k$       |

**Table S2. Overview of surface exposure measures.** Different surface measures were tested and trained for their ability to discriminate epitope from non-epitope residues (for details see text).
